# Supplementary material for: Economically feasible strategy for confirmation of pharmaceuticals in hospital effluent using screening analysis
Source: Royal Society of Chemistry journal article supplement (doi:10.1039/d0ay01397h), 2020-01-01
Supplement: d0ay01397h1.pdf [file d0ay01397h1.pdf]

## Supplementary Material

### **Economically feasible strategy for confirmation of pharmaceuticals in hospital effluent using screening analysis**

Renata M. Cardoso,<sup>a</sup> Alexandro Dallegrave,<sup>a</sup> Raquel W. Becker,<sup>a</sup> Débora S. Araújo,<sup>a</sup> and

Carla Sirtori<sup>a\*</sup>

<sup>a</sup>*Instituto de Química - UFRGS, Av. Bento Gonçalves, 9500, Porto Alegre-RS, Brazil.*

\*Corresponding author: Prof. Dr. Carla Sirtori

*E-mail address:* carla.sirtori@ufrgs.br

Tel.: +55 51 33087796

## Section S1. Chemical reagents and materials

Commercial pharmaceuticals used were acquired through donation. To clean-up the commercial pharmaceuticals mix solutions, aluminum oxide 90 active basic (Vetec), silica gel 60 (Macherey-Nagel), commercial 5 mL syringe and glass wool was used. Qualitative filter paper was used to filter raw samples. Afterwards, the samples were filtered with nylon membranes (0.45  $\mu\text{m}$ ). SPE cartridges Oasis HLB<sup>®</sup> (500 mg, 6 mL) from Waters were used. To solid phase extraction (SPE) procedure HPLC grade methanol (PanReac AppliChem), ultrapure water (18.2 M $\Omega$ .cm, Millipore, Bedford, USA) and PVDF syringe filters (0.22  $\mu\text{m}$ ) was used.

To chromatographic analysis, methanol LC-MS grade (Fluka), ultrapure water, formic acid (98% purity, Sigma Aldrich), ammonium formate and ammonium acetate salts (97%, Sigma Aldrich) was used.

## Section S2. Analysis of commercial pharmaceutical compounds

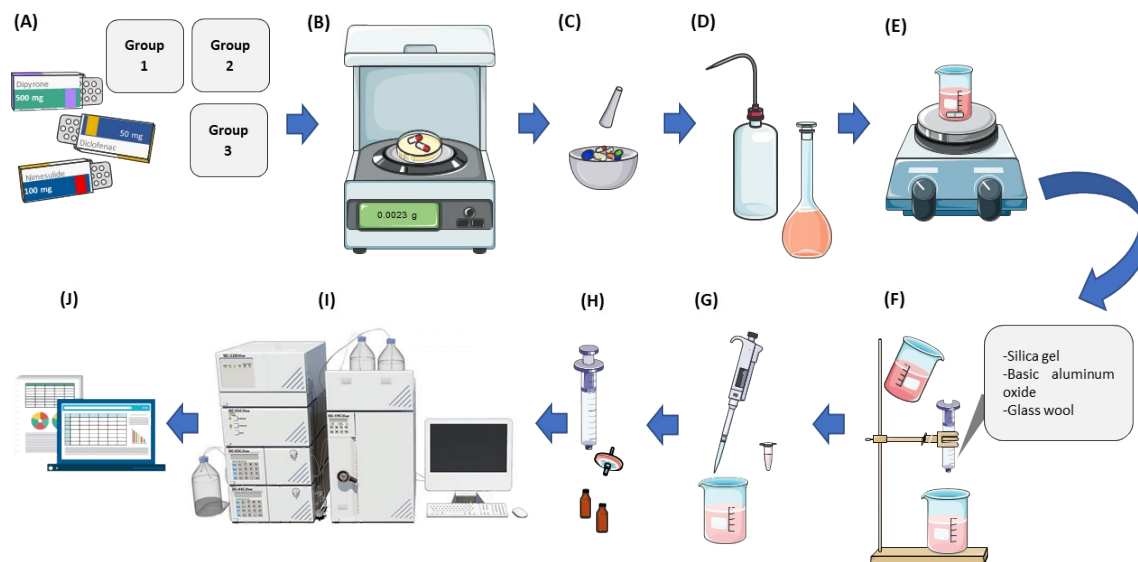

**FigureS1.** Illustration of the preparation of commercial pharmaceuticals mix solutions: (A) Separation of commercial pharmaceuticals into groups; (B) Weighing of commercial pharmaceuticals; (C) Maceration of commercial pharmaceuticals; (D) Solubilization of commercial pharmaceuticals in ultrapure water; (E) Agitation of the solutions; (F) Clean-up step; (G) 1 mL aliquot; (H) Filtration of the solutions in 0.22 µm PVDF filter; (I) Analysis at UHPLC-QTOF MS; (J) Data processing.

### Section S3. Physicochemical characterization of hospital effluent samples studied

Characterization of the samples was carried out by determination the following physicochemical parameters: pH, electrical conductivity, concentrations of total phosphates and chlorides, chemical oxygen demand (COD), biochemical oxygen demand (BOD<sub>5</sub>), BOD<sub>5</sub>/COD ratio, suspended total solids (STS) and total solids (ST). The methods used in the analysis of characterization of these waste waters were based on Standard Methods for the Examination of Water and Wastewater Analysis, according to American Public Health Association (APHA), 2012.

**Table S1.** Physicochemical parameters of the samples.

| Parameters                                                         | Months sampled |            |            |            |            |            | LOQ  | LOD  |
|--------------------------------------------------------------------|----------------|------------|------------|------------|------------|------------|------|------|
|                                                                    | Aug.<br>17     | Sep.<br>17 | Oct.<br>17 | Nov.<br>17 | Dec.<br>17 | Jan.<br>18 |      |      |
| pH                                                                 | 8.86           | 8.51       | 8.98       | 8.47       | 8.53       | 8.23       | -    | -    |
| Conductivity( $\mu\text{S cm}^{-1}$ )                              | 1209.0         | 427.0      | 722.0      | 611.0      | 114.0      | 812.0      | 1.0  | 0.2  |
| Total chloride (mg L <sup>-1</sup> )                               | 98.80          | 33.90      | 49.10      | 44.50      | 61.70      | 55.90      | 0.50 | 0.02 |
| Total phosphate(mg L <sup>-1</sup> PO <sub>4</sub> <sup>3-</sup> ) | 53.37          | 5.39       | 9.45       | 5.90       | 14.58      | 21.85      | 0.03 | 0.01 |
| COD (mg L <sup>-1</sup> de O <sub>2</sub> )                        | 571.0          | 350.0      | 217.0      | 209.0      | 365.0      | 616.0      | 5.0  | 0.8  |
| BOD <sub>5</sub> (mg L <sup>-1</sup> de O <sub>2</sub> )           | 103.0          | 117.0      | 69.0       | 70.0       | 82.0       | 312.0      | 2.0  | 0.6  |
| BOD <sub>5</sub> /COD                                              | 0.18           | 0.33       | 0.32       | 0.33       | 0.22       | 0.51       | -    | -    |
| TS (mg L <sup>-1</sup> )                                           | 60             | 29         | 67         | 76         | 112        | 117        | 10   | 5    |
| STS (mg L <sup>-1</sup> )                                          | 654            | 218        | 261        | 317        | 177        | 367        | 10   | 5    |

Where: LOQ: Limit of Quantification; LOD: Limit of Detection; COD: Chemical Oxygen Demand; BOD<sub>5</sub>: Biochemical Oxygen Demand; STS: Suspended Total Solids; ST: Total Solids.

Physicochemical parameters evaluated were, in general, variable over the monitored time. According to Carraro et al., (2016)<sup>1</sup> the great variability of the characteristics of these effluents is recurrent due to the many variables that influence them, such as the size of the hospital, the number of patients, the number of wards, the number and types of services, country, population and seasonality.

The effluents, according to Resolution 357/2005 of the National Environment Council(CONAMA) from Brazil, must have a pH between 5.0 and 9.0 so that they can be

discharged directly into sewage because at extreme pHs, the physiology of animals and aquatic vegetables can be changed. In this sense, all samples were according CONAMA regulation parameters.

High values of conductivity obtained for the analyzed samples, in the range of 114 to 1209  $\mu\text{S cm}^{-1}$ , are characteristic of the occurrence of high concentration of minerals. High conductivity could mean the risk of salinization of aquatic bodies that receive effluent without treatment.<sup>2</sup>

The  $\text{BOD}_5/\text{COD}$  is a parameter that deserve attention because could reflect in the biodegradability of the matrix under study. According to Kumar et al., (2010),<sup>3</sup> $\text{BOD}_5/\text{COD}$  close to 1 can be indicative for a biodegradable matrix, even that values close to 0.5 could represent a considerable index of biodegradability according to Esplugas et al., (2004)<sup>4</sup>. With the exception of the January sample, which obtained a value very close to 0.5, the other samples presented  $\text{BOD}_5/\text{COD}$  indexes below 0.5. The possible reduced biodegradability of these samples is an indication of the possible limitation of the treatment performance, of this effluent, in biological treatment systems.

## Section S4. Evaluation of solid phase extraction (SPE)

Figure S2 illustrates the two methods tested for the SPE technique. It is possible to verify that the only difference between the two tested method is the elution step. The other steps of SPE occurred equally in both methods.

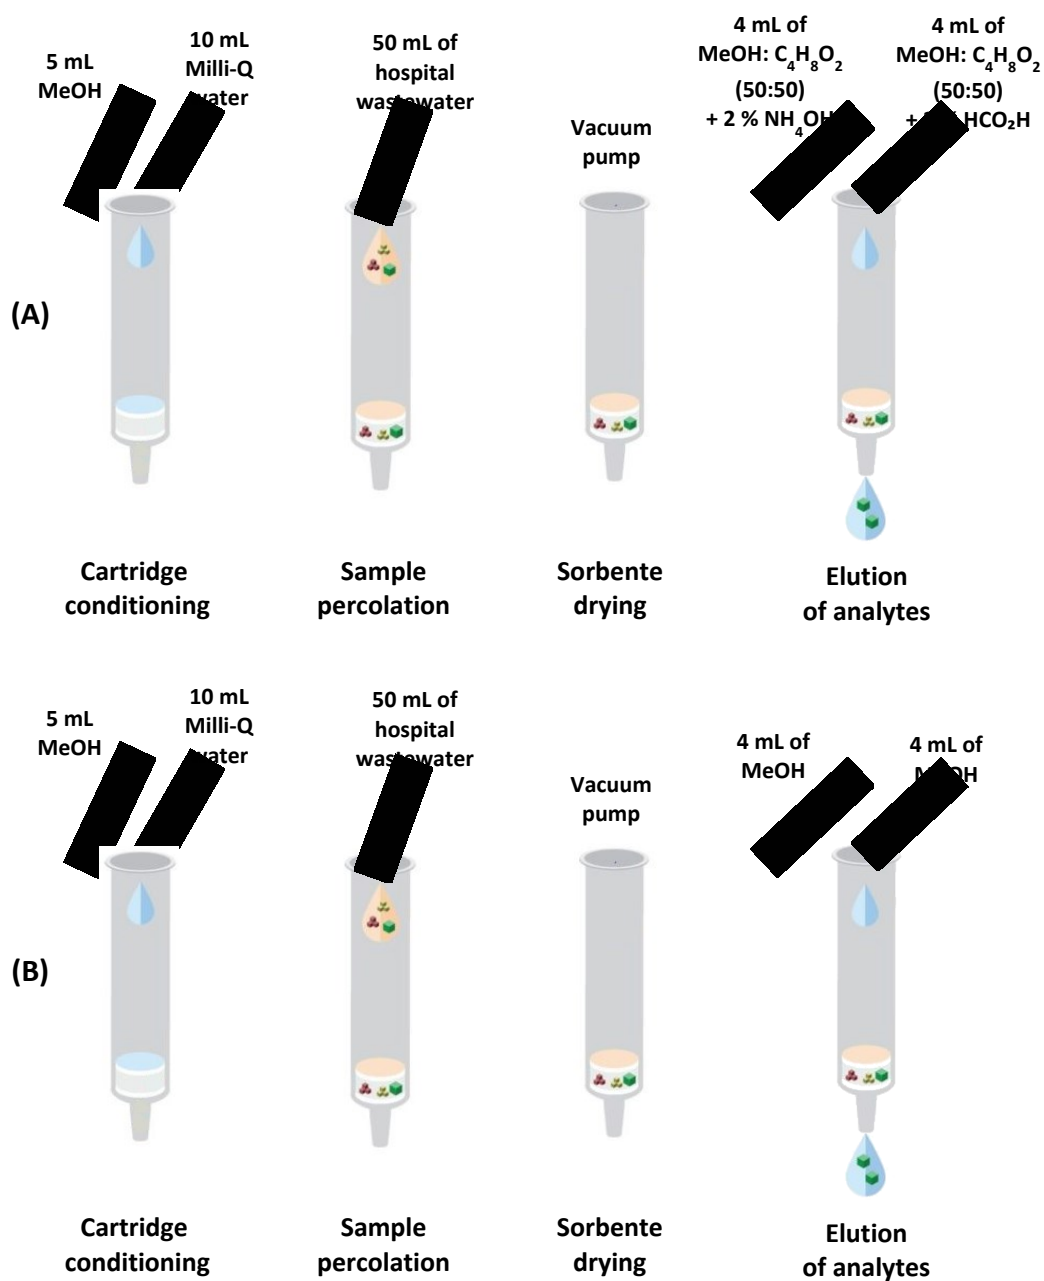

Figure S2. Evaluation of solid phase extraction (SPE):(A) Method A illustration; (B) Method B illustration.

## Section S5. Sample preparation

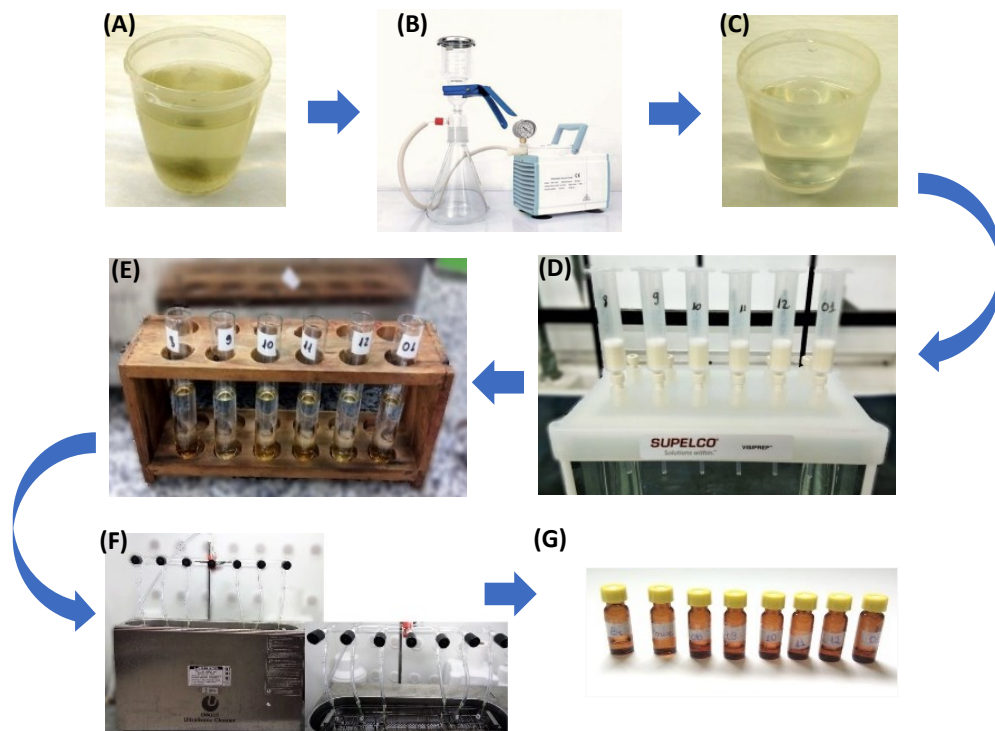

**Figure S3** Scheme with photos of the sample preparation step: Figure(A) shows a sample of raw hospital effluent; Figure (B) shows the sample filtration step; Figure(C) shows a sample of hospital wastewater after filtration; Figure(D) shows the stage of conditioning the cartridges and percolating the sample; Figure(E) shows the elution of the analytes; Figure (F) illustrates the drying step of the sample under  $N_2$  flow; Figure (G) illustrates the sample reconstitution step with MeOH:H<sub>2</sub>O (10:90), filtration in at 0.22  $\mu$ m PVDF filter and the conditioning in vials.

## Section S6. Construction of pharmaceuticals databases

**Table S2.** Summarized pharmaceuticals contained in our purpose built-database.

| Compound              | Ionization mode | rt (min) | Measured m/z | Ion formula                                                                    | Calculated m/z | error (ppm) | mSigma* | RDB** |
|-----------------------|-----------------|----------|--------------|--------------------------------------------------------------------------------|----------------|-------------|---------|-------|
| 2 - Hydroxyquinoline  | Positive        | 0.9      | 146.0593     | C <sub>9</sub> H <sub>8</sub> NO                                               | 146.0600       | 5.0         | 49.7    | 6.5   |
| 8 - Hydroxyquinoline  | Positive        | 0.9      | 146.0593     | C <sub>9</sub> H <sub>8</sub> NO                                               | 146.0600       | 4.9         | 49.9    | 6.5   |
| Aceclofenac           | Positive        | 9.0      | 354.0298     | C <sub>16</sub> H <sub>14</sub> Cl <sub>2</sub> NO <sub>4</sub>                | 354.0294       | -1.1        | 7.0     | 9.5   |
| Acetaminophen         | Positive        | 2.3      | 152.0708     | C <sub>8</sub> H <sub>10</sub> NO <sub>2</sub>                                 | 152.0706       | -1.2        | 3.1     | 4.5   |
|                       | Negative        | 2.3      | 150.0560     | C <sub>8</sub> H <sub>8</sub> NO <sub>2</sub>                                  | 150.0561       | 0.4         | 4.8     | 5.5   |
| Albendazole           | Positive        | 8.7      | 266.0960     | C <sub>12</sub> H <sub>16</sub> N <sub>3</sub> O <sub>2</sub> S                | 266.0958       | -0.8        | 6.5     | 6.5   |
| Amiodarone            | Positive        | 10.6     | 646.0319     | C <sub>25</sub> H <sub>30</sub> I <sub>2</sub> NO <sub>3</sub>                 | 646.0310       | -1.5        | 6.6     | 10.5  |
| Amlodipine            | Positive        | 8.1      | 409.1528     | C <sub>20</sub> H <sub>26</sub> ClN <sub>2</sub> O <sub>5</sub>                | 409.1525       | -0.8        | 5.9     | 8.5   |
| Amoxicillin           | Positive        | 1.5      | 366.1123     | C <sub>16</sub> H <sub>20</sub> N <sub>3</sub> O <sub>5</sub> S                | 366.1118       | -1.2        | 10.2    | 8.5   |
| Apresoline            | Positive        | 1.5      | 161.0822     | C <sub>8</sub> H <sub>9</sub> N <sub>4</sub>                                   | 161.0822       | 0.1         | 8.5     | 6.5   |
| Arginine              | Positive        | 0.9      | 175.1189     | C <sub>6</sub> H <sub>15</sub> N <sub>4</sub> O <sub>2</sub>                   | 171.1900       | 0.1         | 7.8     | 1.5   |
| Atenolol              | Positive        | 2.1      | 267.1701     | C <sub>14</sub> H <sub>23</sub> N <sub>2</sub> O <sub>3</sub>                  | 267.1703       | 0.9         | 7.2     | 4.5   |
| Betahistine           | Positive        | 1.0      | 137.1066     | C <sub>8</sub> H <sub>13</sub> N <sub>2</sub>                                  | 137.1073       | 5.0         | 49.8    | 3.5   |
| Betamethasone         | Positive        | 8.2      | 393.2071     | C <sub>22</sub> H <sub>30</sub> FO <sub>5</sub>                                | 393.2072       | 0.2         | 0.7     | 7.5   |
| Bilastine             | Positive        | 7.6      | 464.2905     | C <sub>28</sub> H <sub>38</sub> N <sub>3</sub> O <sub>3</sub>                  | 464.2908       | 0.6         | 11.7    | 11.5  |
| Bisacodyl             | Positive        | 8.5      | 362.1383     | C <sub>22</sub> H <sub>20</sub> NO <sub>4</sub>                                | 362.1387       | 1.0         | 4.9     | 13.5  |
| Bromazepam            | Positive        | 7.3      | 316.0088     | C <sub>14</sub> H <sub>11</sub> BrN <sub>3</sub> O                             | 316.0080       | -2.5        | 11.0    | 10.5  |
| Bupropion             | Positive        | 6.1      | 240.1150     | C <sub>13</sub> H <sub>19</sub> ClNO                                           | 240.1150       | 0.0         | 3.0     | 4.5   |
| Buspirone             | Positive        | 6.1      | 386.2551     | C <sub>21</sub> H <sub>32</sub> N <sub>5</sub> O <sub>2</sub>                  | 386.2551       | -0.2        | 12.9    | 8.5   |
| Caffeine              | Positive        | 4.2      | 195.0871     | C <sub>8</sub> H <sub>11</sub> N <sub>4</sub> O <sub>2</sub>                   | 195.0877       | 2.6         | 4.0     | 5.5   |
| Candesartan Cilexetil | Positive        | 10.6     | 611.2620     | C <sub>33</sub> H <sub>35</sub> N <sub>6</sub> O <sub>6</sub>                  | 611.2613       | -1.2        | 2.6     | 19.5  |
| Captopril             | Positive        | 4.0      | 218.0845     | C <sub>9</sub> H <sub>16</sub> NO <sub>3</sub> S                               | 218.0845       | 0.1         | 4.8     | 2.5   |
| Carisoprodol          | Positive        | 8.0      | 261.1807     | C <sub>12</sub> H <sub>25</sub> N <sub>2</sub> O <sub>4</sub>                  | 261.1809       | 0.5         | 10.3    | 1.5   |
| Cefadroxil            | Positive        | 1.6      | 364.0965     | C <sub>16</sub> H <sub>18</sub> N <sub>3</sub> O <sub>5</sub> S                | 364.0962       | -1.0        | 7.8     | 9.5   |
| Celecoxib             | Positive        | 9.4      | 382.0835     | C <sub>17</sub> H <sub>15</sub> F <sub>3</sub> N <sub>3</sub> O <sub>2</sub> S | 382.0832       | -1.0        | 12.4    | 10.5  |
|                       | Negative        | 9.4      | 380.0686     | C <sub>17</sub> H <sub>13</sub> F <sub>3</sub> N <sub>3</sub> O <sub>2</sub> S | 380.0686       | 0.0         | 22.4    | 11.5  |
| Chlormadinone Acetate | Positive        | 9.7      | 405.1832     | C <sub>23</sub> H <sub>30</sub> ClO <sub>4</sub>                               | 405.1827       | -1.2        | 8.8     | 8.5   |
| Ciprofloxacin         | Positive        | 5.0      | 332.1409     | C <sub>17</sub> H <sub>19</sub> FN <sub>3</sub> O <sub>3</sub>                 | 332.1405       | -1.2        | 4.6     | 9.5   |
| Citalopram            | Positive        | 6.9      | 325.1713     | C <sub>20</sub> H <sub>22</sub> FN <sub>2</sub> O                              | 325.1711       | -0.7        | 1.8     | 10.5  |
| Clonazepam            | Positive        | 7.7      | 316.0479     | C <sub>15</sub> H <sub>11</sub> ClN <sub>3</sub> O <sub>3</sub>                | 316.0483       | 1.5         | 2.1     | 11.5  |
|                       | Negative        | 7.7      | 314.0329     | C <sub>15</sub> H <sub>9</sub> ClN <sub>3</sub> O <sub>3</sub>                 | 314.0338       | 2.8         | 12.2    | 12.5  |
| Codeine               | Positive        | 2.9      | 300.1600     | C <sub>18</sub> H <sub>22</sub> NO <sub>3</sub>                                | 300.1594       | -2.1        | 7.1     | 8.5   |
| Cyclobenzaprine       | Positive        | 7.7      | 276.1746     | C <sub>20</sub> H <sub>22</sub> N                                              | 276.1747       | 0.1         | 40.8    | 10.5  |
| Deflazacort           | Positive        | 8.8      | 442.2227     | C <sub>25</sub> H <sub>32</sub> NO <sub>6</sub>                                | 442.2224       | -0.6        | 3.1     | 10.5  |
|                       | Negative        | 8.8      | 440.2074     | C <sub>25</sub> H <sub>30</sub> NO <sub>6</sub>                                | 440.2079       | 1.0         | 0.9     | 11.5  |
| Desloratadine         | Positive        | 7.7      | 311.1311     | C <sub>19</sub> H <sub>20</sub> ClN <sub>2</sub>                               | 311.1310       | -0.6        | 4.4     | 10.5  |
| Desvenlafaxine        | Positive        | 5.1      | 264.1958     | C <sub>16</sub> H <sub>26</sub> NO <sub>2</sub>                                | 264.1958       | 0.1         | 0.7     | 4.5   |
| Diazepam              | Positive        | 8.9      | 285.0792     | C <sub>16</sub> H <sub>14</sub> ClN <sub>2</sub> O                             | 285.0789       | -0.8        | 6.3     | 10.5  |
| Diclofenac            | Positive        | 9.6      | 296.0225     | C <sub>14</sub> H <sub>12</sub> Cl <sub>2</sub> NO <sub>2</sub>                | 296.0240       | 5.0         | 8.4     | 8.5   |
|                       | Negative        | 8.5      | 294.0096     | C <sub>14</sub> H <sub>10</sub> Cl <sub>2</sub> NO <sub>2</sub>                | 294.0094       | -0.6        | 8.4     | 9.5   |
| Dimenhydrinate        | Positive        | 4.7      | 215.0328     | C <sub>7</sub> H <sub>8</sub> ClN <sub>4</sub> O <sub>2</sub>                  | 215.0330       | 1.1         | 6.3     | 5.5   |
| Dipyrrone             | Positive        | 4.2      | 218.1284     | C <sub>12</sub> H <sub>16</sub> N <sub>3</sub> O                               | 218,1288       | 2.0         | 9.4     | 6.5   |



|                     |          |      |          |                          |          |      |      |      |
|---------------------|----------|------|----------|--------------------------|----------|------|------|------|
|                     | Negative | 4.2  | 310.0864 | $C_{13}H_{16}N_3O_4S$    | 310.0867 | 0.9  | 16.4 | 7.5  |
| Divalproate         | Positive | 9.0  | 145.1222 | $C_8H_{17}O_2$           | 145.1223 | 0.7  | 1.0  | 0.5  |
| Donepezil           | Positive | 6.2  | 380.2221 | $C_{24}H_{30}NO_3$       | 380.2220 | -0.1 | 1    | 10.5 |
| Doxycycline         | Positive | 7.1  | 445.1616 | $C_{22}H_{25}N_2O_8$     | 445.1605 | -2.3 | 18.3 | 11.5 |
| Duloxetine          | Positive | 7.9  | 298.1257 | $C_{18}H_{20}NOS$        | 298.1260 | 1    | 9.9  | 9.5  |
| Dydrogesterone      | Positive | 9.6  | 313.2167 | $C_{21}H_{29}O_2$        | 313.2162 | -1.6 | 3.4  | 7.5  |
| Enalapril           | Positive | 7.1  | 377.2055 | $C_{20}H_{29}N_2O_5$     | 377.2071 | 4.1  | 13.3 | 7.5  |
| Escitalopram        | Positive | 6.9  | 325.1712 | $C_{20}H_{22}FN_2O$      | 325.1711 | -0.3 | 3.5  | 10.5 |
| Estradiol           | Positive | 10.5 | 273.1849 | $C_{18}H_{25}O_2$        | 273.1849 | -0.1 | 15.3 | 6.5  |
|                     | Positive | 9.5  | 288.1594 | $C_{17}H_{22}NO_3$       | 288.1594 | 0.1  | 3.2  | 7.5  |
| Etodolac            | Negative | 8.7  | 286.1446 | $C_{17}H_{20}NO_3$       | 286.1449 | 0.8  | 6.6  | 8.5  |
|                     | Positive | 7.8  | 502.2950 | $C_{32}H_{40}NO_4$       | 502.2952 | 0.4  | 13.7 | 13.5 |
| Fexofenadine        | Negative | 7.7  | 500.2796 | $C_{32}H_{38}NO_4$       | 500.2806 | 2.0  | 5.4  | 14.5 |
|                     | Positive | 8.4  | 310.1412 | $C_{17}H_{19}F_3NO$      | 310.1413 | 0.3  | 4.3  | 7.5  |
| Fluoxetine          | Positive | 6.3  | 331.0153 | $C_{12}H_{12}ClN_2O_5S$  | 331.0150 | -1.0 | 14.6 | 7.5  |
| Furosemide          | Negative | 5.4  | 329.0004 | $C_{12}H_{10}ClN_2O_5S$  | 329.0004 | 0.2  | 5.3  | 8.5  |
|                     | Positive | 3.0  | 288.1595 | $C_{17}H_{22}NO_3$       | 288.1594 | -0.4 | 13.6 | 7.5  |
| Galantamine         | Positive | 2.2  | 297.9719 | $C_7H_9ClN_3O_4S_2$      | 297.9718 | -0.6 | 10.0 | 4.5  |
| Hydrochlorothiazide | Negative | 2.2  | 295.9567 | $C_7H_7ClN_3O_4S_2$      | 295.9572 | 1.8  | 5.5  | 5.5  |
|                     | Positive | 8.0  | 375.1842 | $C_{21}H_{28}ClN_2O_2$   | 375.1834 | -2.2 | 5.0  | 8.5  |
| Hydroxyzine         | Positive | 10.0 | 207.1376 | $C_{13}H_{19}O_2$        | 207.1380 | 1.8  | 1.5  | 4.5  |
| Ibuprofen           | Negative | 8.6  | 205.1235 | $C_{13}H_{17}O_2$        | 205.1234 | -0.4 | 1.2  | 5.5  |
|                     | Positive | 5.3  | 142.1591 | $C_9H_{20}N$             | 142.1590 | -0.7 | 1.5  | 0.5  |
| Isometheptene       | Positive | 8.4  | 255.1014 | $C_{16}H_{15}O_3$        | 255.1016 | 0.7  | 3.3  | 9.5  |
|                     | Negative | 7.0  | 253.0874 | $C_{16}H_{13}O_3$        | 253.0870 | -1.5 | 6.0  | 10.5 |
|                     | Positive | 8.7  | 256.0967 | $C_{15}H_{14}NO_3$       | 256.0968 | 0.5  | 1.8  | 9.5  |
|                     | Negative | 6.2  | 254.0818 | $C_{15}H_{12}NO_3$       | 254.0823 | 1.7  | 11.2 | 10.5 |
|                     | Positive | 5.6  | 256.0151 | $C_9H_8Cl_2N_5$          | 256.0151 | -0.0 | 4.8  | 7.5  |
| Lamotrigine         | Negative | 5.9  | 254.0009 | $C_9H_6Cl_2N_5$          | 254.0006 | -1.3 | 5.8  | 8.5  |
|                     | Positive | 7.6  | 370.0835 | $C_{16}H_{15}F_3N_3O_2S$ | 370.0832 | -1.0 | 6.2  | 9.5  |
| Lansoprazole        | Positive | 3.0  | 237.1598 | $C_{13}H_{21}N_2O_2$     | 237.1598 | -0.2 | 15.7 | 4.5  |
| Levodropropizine    | Positive | 8.2  | 477.2323 | $C_{29}H_{34}ClN_2O_2$   | 477.2303 | -4.0 | 18.2 | 13.5 |
| Loperamide          | Positive | 10.3 | 383.1529 | $C_{22}H_{24}ClN_2O_2$   | 383.1521 | -2.2 | 7.9  | 11.5 |
| Loratadine          | Positive | 8.3  | 423.1700 | $C_{22}H_{24}ClN_6O$     | 423.1695 | -1.2 | 2.2  | 13.5 |
| Losartan            | Positive | 0.7  | 147.1128 | $C_6H_{15}N_2O_2$        | 147.1128 | 0    | 7.6  | 0.5  |
| Lysine              | Positive | 9.0  | 391.1945 | $C_{25}H_{28}N_2Cl$      | 391.1936 | -2.5 | 11.6 | 12.5 |
| Meclizine           | Positive | 10.4 | 242.1172 | $C_{15}H_{16}NO_2$       | 242.1176 | 5    | 3.9  | 8.5  |
| Mefenamic acid      | Negative | 8.8  | 240.1031 | $C_{15}H_{14}NO_2$       | 240.1030 | -0.4 | 7.8  | 9.5  |
|                     | Positive | 9.0  | 352.0422 | $C_{14}H_{14}N_3O_4S_2$  | 352.0420 | -0.6 | 11.4 | 9.5  |
| Meloxicam           | Negative | 6.7  | 350.0272 | $C_{14}H_{12}N_3O_4S_2$  | 350.0275 | 0.8  | 12.0 | 10.5 |
|                     | Positive | 1.2  | 154.0503 | $C_7H_8NO_3$             | 154.0499 | -3.1 | 13.4 | 4.5  |
| Mesalazine          | Positive | 1.1  | 130.1087 | $C_4H_{12}N_5$           | 130.1087 | 0.4  | 7.9  | 1.5  |
| Metformin           | Positive | 4.8  | 300.1482 | $C_{14}H_{23}ClN_3O_2$   | 300.1473 | -2.9 | 20.0 | 4.5  |
| Metoclopramide      | Positive | 2.6  | 172.0717 | $C_6H_{10}N_3O_3$        | 172.0717 | -0.4 | 2.4  | 3.5  |
|                     | Positive | 8.8  | 231.1014 | $C_{14}H_{15}O_3$        | 231.1016 | 0.6  | 1.2  | 7.5  |
| Naproxen            | Negative | 6.9  | 229.0867 | $C_{14}H_{13}O_3$        | 229.0870 | 1.4  | 5.0  | 8.5  |
|                     | Positive | 4.0  | 336.1752 | $C_{17}H_{26}N_3O_2S$    | 336.1740 | -3.5 | 7.4  | 6.5  |
| Naratriptan         | Positive | 8.3  | 309.0542 | $C_{13}H_{13}N_2O_5S$    | 309.0540 | -0.7 | 8.5  | 8.5  |
|                     | Negative | 8.0  | 307.0389 | $C_{13}H_{11}N_2O_5S$    | 307.0394 | 1.5  | 8.0  | 9.5  |
| Nimesulide          | Positive | 7.9  | 308.0337 | $C_{12}H_{10}N_3O_5S$    | 308.0336 | -0.3 | 9.4  | 9.5  |
| Nitazoxanide        | Negative | 6.7  | 306.0190 | $C_{12}H_8N_3O_5S$       | 306.0190 | -0.1 | 7.8  | 10.5 |

|                 |          |      |          |                                                                                |          |      |      |      |
|-----------------|----------|------|----------|--------------------------------------------------------------------------------|----------|------|------|------|
| Nitrofurantoin  | Positive | 3.6  | 239.0406 | C <sub>8</sub> H <sub>7</sub> N <sub>4</sub> O <sub>5</sub>                    | 239.0411 | 1.9  | 3.2  | 7.5  |
|                 | Negative | 3.3  | 237.0265 | C <sub>8</sub> H <sub>5</sub> N <sub>4</sub> O <sub>5</sub>                    | 237.0265 | 0.1  | 7.0  | 8.5  |
| Norethisterone  | Positive | 8.9  | 299.2009 | C <sub>20</sub> H <sub>27</sub> O <sub>2</sub>                                 | 299.2006 | -1.2 | 0.7  | 7.5  |
| Norfloracin     | Positive | 4.8  | 320.1413 | C <sub>16</sub> H <sub>19</sub> FN <sub>3</sub> O <sub>3</sub>                 | 320.1405 | -2.4 | 3.4  | 8.5  |
| Nortriptyline   | Positive | 8.6  | 264.1747 | C <sub>19</sub> H <sub>22</sub> N                                              | 264.1747 | -0.2 | 1.7  | 9.5  |
| Omeprazole      | Positive | 7.6  | 346.1224 | C <sub>17</sub> H <sub>20</sub> N <sub>3</sub> O <sub>3</sub> S                | 346.1220 | -1.1 | 17.0 | 9.5  |
|                 | Negative | 7.7  | 344.1072 | C <sub>17</sub> H <sub>18</sub> N <sub>3</sub> O <sub>3</sub> S                | 344.1074 | 0.8  | 13.3 | 10.5 |
| Ondansetron     | Positive | 5.6  | 294.1603 | C <sub>18</sub> H <sub>20</sub> N <sub>3</sub> O                               | 294.1601 | -0.8 | 5.2  | 10.5 |
| Oxomemazine     | Positive | 6.3  | 331.1474 | C <sub>18</sub> H <sub>23</sub> N <sub>2</sub> O <sub>2</sub> S                | 331.1475 | 0.3  | 11.7 | 8.5  |
| Oxymetazoline   | Positive | 7.3  | 261.1964 | C <sub>16</sub> H <sub>25</sub> N <sub>2</sub> O                               | 261.1961 | -1.0 | 1.5  | 5.5  |
| Pantoprazole    | Positive | 7.5  | 384.0831 | C <sub>16</sub> H <sub>16</sub> F <sub>2</sub> N <sub>3</sub> O <sub>4</sub> S | 384.0824 | -1.7 | 8.0  | 9.5  |
| Papaverine      | Positive | 5.8  | 340.1548 | C <sub>20</sub> H <sub>22</sub> NO <sub>4</sub>                                | 340.1543 | -1.2 | 1.8  | 10.5 |
| Prednisolone    | Positive | 7.7  | 361.2013 | C <sub>21</sub> H <sub>29</sub> O <sub>5</sub>                                 | 361.2010 | -0.9 | 3.4  | 7.5  |
|                 | Negative | 7.7  | 359.1853 | C <sub>21</sub> H <sub>27</sub> O <sub>5</sub>                                 | 359.1864 | 3.0  | 22.2 | 8.5  |
| Prednisone      | Positive | 7.4  | 359.1859 | C <sub>21</sub> H <sub>27</sub> O <sub>5</sub>                                 | 359.1853 | -1.7 | 2.9  | 8.5  |
|                 | Negative | 7.3  | 357.1708 | C <sub>22</sub> H <sub>21</sub> N <sub>4</sub> O                               | 357.1721 | 3.7  | 19.3 | 14.5 |
| Progesterone    | Positive | 9.9  | 315.2323 | C <sub>21</sub> H <sub>31</sub> O <sub>2</sub>                                 | 315.2319 | -1.4 | 3.6  | 6.5  |
| Propranolol     | Positive | 6.8  | 260.1646 | C <sub>16</sub> H <sub>22</sub> NO <sub>2</sub>                                | 260.1645 | -0.3 | 21.6 | 6.5  |
| Pseudoephedrine | Positive | 3.1  | 166.1225 | C <sub>10</sub> H <sub>16</sub> NO                                             | 166.1226 | 0.9  | 1.1  | 3.5  |
|                 | Positive | 1.2  | 170.0811 | C <sub>8</sub> H <sub>12</sub> NO <sub>3</sub>                                 | 170.0812 | 0.2  | 6.3  | 3.5  |
| Pyridoxine      | Negative | 1.6  | 168.0666 | C <sub>8</sub> H <sub>10</sub> NO <sub>3</sub>                                 | 168.0666 | 0.1  | 18.3 | 4.5  |
|                 | Positive | 7.5  | 384.1742 | C <sub>21</sub> H <sub>26</sub> N <sub>3</sub> O <sub>2</sub> S                | 384.1740 | -0.4 | 9.9  | 10.5 |
| Racecadotril    | Positive | 9.1  | 386.1426 | C <sub>21</sub> H <sub>24</sub> NO <sub>4</sub> S                              | 386.1421 | -1.5 | 16.1 | 10.5 |
| Ranitidine      | Positive | 2.3  | 315.1490 | C <sub>13</sub> H <sub>23</sub> N <sub>4</sub> O <sub>3</sub> S                | 315.1485 | -1.5 | 7.4  | 4.5  |
|                 | Negative | 4.5  | 313.1336 | C <sub>13</sub> H <sub>21</sub> N <sub>4</sub> O <sub>3</sub> S                | 313.1340 | 1.2  | 4.3  | 5.5  |
| Rifamycin       | Positive | 10.3 | 698.3144 | C <sub>37</sub> H <sub>48</sub> NO <sub>12</sub>                               | 698.3171 | 3.9  | 30.0 | 14.5 |
| Rosuvastatin    | Positive | 8.2  | 482.1755 | C <sub>22</sub> H <sub>29</sub> FN <sub>3</sub> O <sub>6</sub> S               | 482.1756 | 0.0  | 10.5 | 9.5  |
|                 | Negative | 7.6  | 480.1602 | C <sub>22</sub> H <sub>27</sub> FN <sub>3</sub> O <sub>6</sub> S               | 480.1610 | 1.7  | 11.0 | 10.5 |
| Secnidazole     | Positive | 3.9  | 186.0873 | C <sub>7</sub> H <sub>12</sub> N <sub>3</sub> O <sub>3</sub>                   | 186.0873 | 0.3  | 5.2  | 3.5  |
| Sertraline      | Positive | 8.4  | 306.0810 | C <sub>17</sub> H <sub>18</sub> Cl <sub>2</sub> N                              | 306.0811 | 0.2  | 8.1  | 8.5  |
| Simvastatin     | Positive | 10.8 | 419.2790 | C <sub>25</sub> H <sub>39</sub> O <sub>5</sub>                                 | 419.2792 | 0.5  | 5.7  | 6.5  |
| Sotalol         | Positive | 1.7  | 273.1269 | C <sub>12</sub> H <sub>21</sub> N <sub>2</sub> O <sub>3</sub> S                | 273.1267 | -0.7 | 6.2  | 3.5  |
| Sumatriptan     | Positive | 3.0  | 296.1430 | C <sub>14</sub> H <sub>22</sub> N <sub>3</sub> O <sub>2</sub> S                | 296.1427 | -1.0 | 6.3  | 5.5  |
|                 | Positive | 8.2  | 390.1456 | C <sub>22</sub> H <sub>20</sub> N <sub>3</sub> O <sub>4</sub>                  | 390.1448 | -1.9 | 1.0  | 14.5 |
| Tadalafil       | Negative | 8.2  | 388.1301 | C <sub>22</sub> H <sub>18</sub> N <sub>3</sub> O <sub>4</sub>                  | 388.1303 | 0.4  | 17.0 | 15.5 |
|                 | Positive | 0.8  | 265.1116 | C <sub>12</sub> H <sub>17</sub> N <sub>4</sub> OS                              | 265.1118 | 0.6  | 12.1 | 6.5  |
| Thioridazine    | Positive | 8.6  | 371.1609 | C <sub>21</sub> H <sub>27</sub> N <sub>2</sub> S <sub>2</sub>                  | 371.1610 | 0.2  | 14.8 | 9.5  |
|                 | Positive | 7.5  | 437.1297 | C <sub>21</sub> H <sub>26</sub> ClN <sub>2</sub> O <sub>4</sub> S              | 437.1296 | -0.2 | 3.2  | 9.5  |
| Tianeptine      | Negative | 8.2  | 435.1150 | C <sub>21</sub> H <sub>24</sub> ClN <sub>2</sub> O <sub>4</sub> S              | 435.1151 | 0.1  | 17.0 | 10.5 |
|                 | Positive | 9.6  | 313.2158 | C <sub>21</sub> H <sub>29</sub> O <sub>2</sub>                                 | 313.2162 | 1.3  | 7.4  | 7.5  |
| Topiramate      | Positive | 6.2  | 340.1060 | C <sub>12</sub> H <sub>22</sub> NO <sub>8</sub> S                              | 340.1061 | 0.1  | 8    | 2.5  |
|                 | Negative | 6.3  | 338.0912 | C <sub>12</sub> H <sub>20</sub> NO <sub>8</sub> S                              | 338.0915 | 1.0  | 8.8  | 3.5  |
| Tramadol        | Positive | 5.2  | 264.1957 | C <sub>16</sub> H <sub>26</sub> NO <sub>2</sub>                                | 264.1958 | 0.3  | 3.4  | 4.5  |
| Trimebutine     | Positive | 7.5  | 388.2125 | C <sub>22</sub> H <sub>30</sub> NO <sub>5</sub>                                | 388.2118 | -1.6 | 12.1 | 8.5  |
| Venlafaxine     | Positive | 6.4  | 278.2113 | C <sub>17</sub> H <sub>28</sub> NO <sub>2</sub>                                | 278.2115 | 0.4  | 0.8  | 4.5  |
| Zuclopenthixol  | Positive | 10.1 | 401.1451 | C <sub>22</sub> H <sub>26</sub> ClN <sub>2</sub> OS                            | 401.1449 | -0.4 | 4.2  | 10.5 |

Where: \* mSigma: indicates the error in relation to the isotopic profile

\*\* RDB: ring double bonds

## Section S7. Process of confirmation of the presence of pharmaceuticals

This Section explains in more detail the process of confirming the presence of pharmaceuticals in the screening analysis.

The pharmaceuticals screening was performed after the samples were analyzed by UHPLC-QTOF MS as described in Section 2.2. Firstly, using the TargetAnalysis software, the databases were loaded to a pharmaceuticals screening method based on the following acceptance parameters: exact mass of the molecular ion with an error less than 5 ppm, mSigma (isotopic profile) with an error less than 50, retention time with a tolerance of 0.2 min and presence of at least characteristic fragments with an error below 5 ppm.

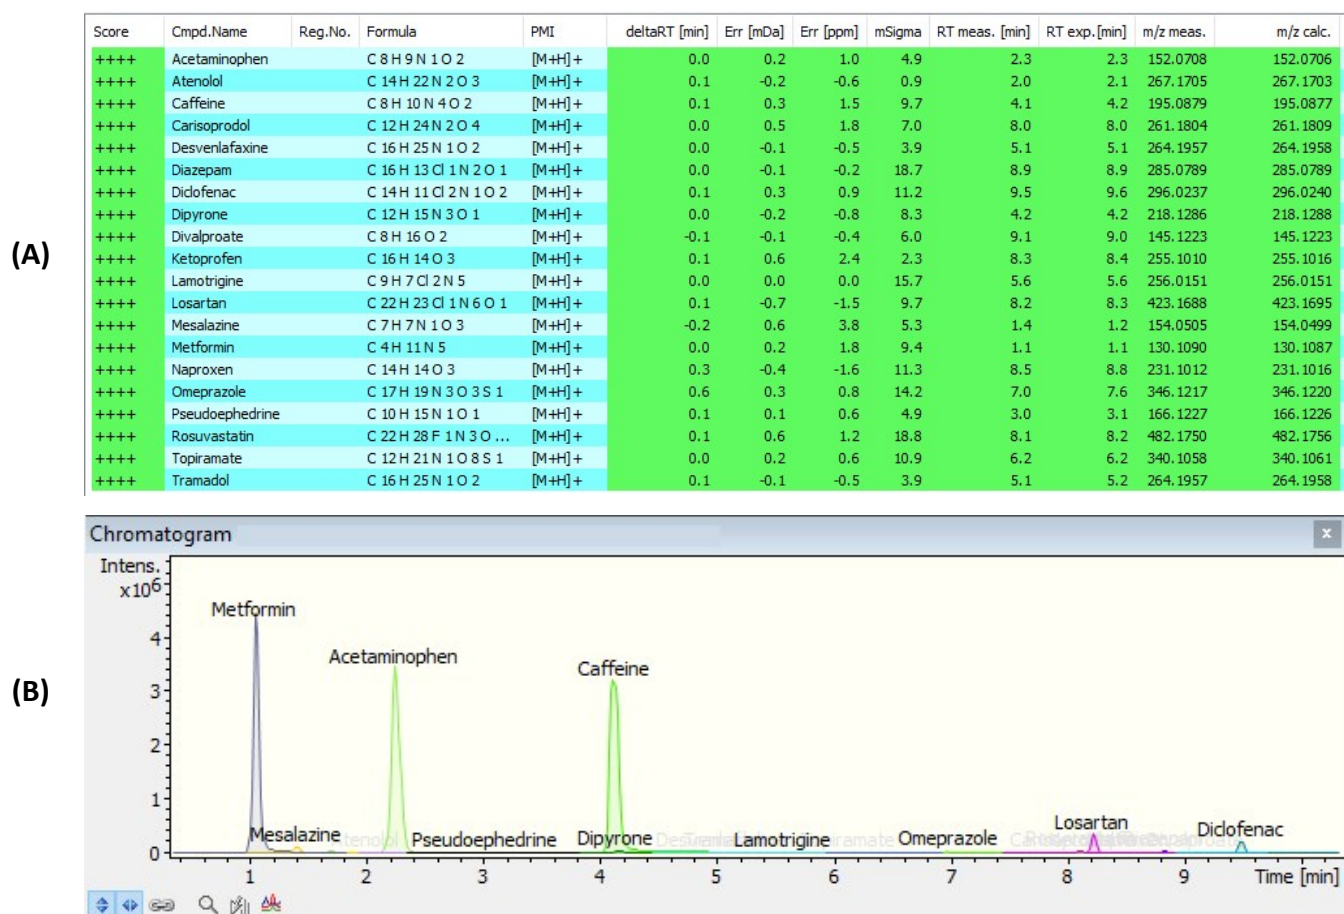

**Figure S4.** Data provided by softwares during data processing analysis in one sample on positive ionization mode: (A) TargetAnalysis software; (B) DataAnalysis software.

Figure S4(A) illustrates the results of screening for a sample (September 2017). The TargetAnalysis software indicates, from a score indicating with the positive symbol (+), how

many acceptance parameters were recognized for the identified pharmaceuticals. Figure S4(A) indicates, for the pharmaceuticals listed, that all acceptance parameters were established in the analyzed sample.

However, in order to confirm the establishment of all identified parameters and, consequently, the presence of pharmaceuticals, using the DataAnalysis software (Figure S4(B), where all molecular ion and fragments were verified.

As an example, Figure S5 illustrates the validation of acceptance parameters for the diclofenac identified in the positive ionization mode (sample September 2017). The chromatographic peak corresponding, possibly, to diclofenac (Figure S4(B)) was observed in 9.5 min. The low collision energy (LE) mass spectrum (Figure S5) showed a signal with  $m/z$  296.0236 Da, which corresponded to the protonated diclofenac  $[C_{14}H_{12}Cl_2NO_2]^+$ . In addition to the molecular ion, the sodium adduct  $[C_{14}H_{11}Cl_2NNaO_2]^+$  was also identified in the low collision energy (LE) mass spectrum. The high collision energy (HE) mass spectrum identified several characteristic fragments compatible with the fragmentation profile of diclofenac, presenting the same retention time as the active ingredient. The active ingredient, the sodium adduct and all the fragments identified showed a mass error of less than 5 ppm and an isotopic profile with an error of less than 50. In addition, the retention time variance was less than, 2 min.

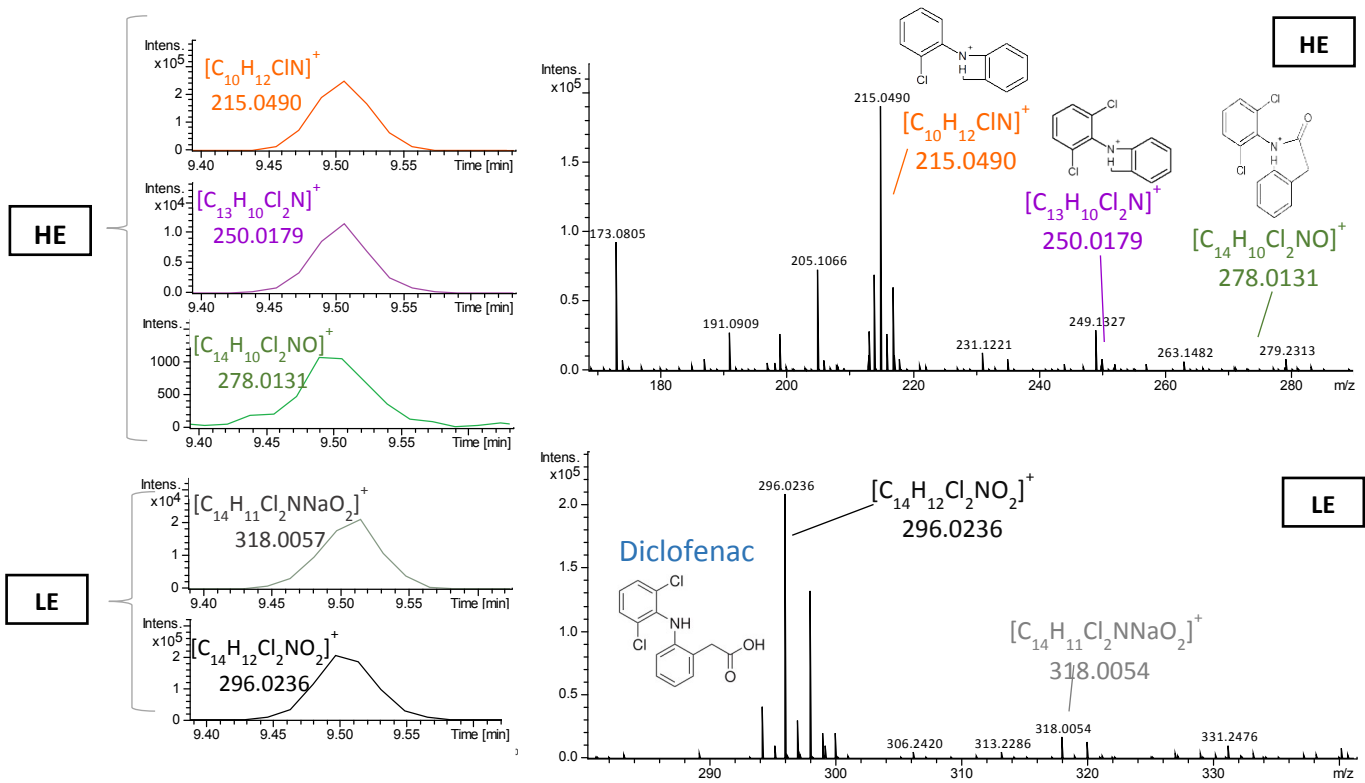

**Figure S5.** Confirmation process of diclofenac in sample analyzed in positive ionization mode. Where HE = High collision energy/MS spectra and LE = Low collision energy/bbCID spectra.

## Section S8.Pharmaceuticals screening results

**Table S3.** Detailed information on the confirmed pharmaceuticals identified.

| Sample   | Compound            | Ionization mode | rt (min) | Measured m/z                                    | Ion formula                                                                    | Calculated m/z | Error (ppm) | mSigma* | RDB** |
|----------|---------------------|-----------------|----------|-------------------------------------------------|--------------------------------------------------------------------------------|----------------|-------------|---------|-------|
| Aug. 17  | Acetaminophen       | Positive        | 2.2      | 152.0708                                        | C <sub>8</sub> H <sub>10</sub> NO <sub>2</sub>                                 | 152.0706       | -1.1        | 3.3     | 4.5   |
|          |                     | Negative        | 2.2      | 150.0560                                        | C <sub>8</sub> H <sub>8</sub> NO <sub>2</sub>                                  | 150.0561       | 0.1         | 15.4    | 5.5   |
|          | Atenolol            | Positive        | 2.0      | 267.1709                                        | C <sub>14</sub> H <sub>23</sub> N <sub>2</sub> O <sub>3</sub>                  | 267.1703       | -2.3        | 0.7     | 4.5   |
|          | Caffeine            | Positive        | 4.1      | 195.0884                                        | C <sub>8</sub> H <sub>11</sub> N <sub>4</sub> O <sub>2</sub>                   | 195.0877       | -3.7        | 14.4    | 5.5   |
|          | Desvenlafaxine      | Positive        | 5.0      | 264.1963                                        | C <sub>16</sub> H <sub>26</sub> NO <sub>2</sub>                                | 264.1958       | -1.7        | 6.9     | 4.5   |
|          | Diazepam            | Positive        | 8.9      | 285.0787                                        | C <sub>16</sub> H <sub>14</sub> ClN <sub>2</sub> O                             | 285.0789       | 0.7         | 19.7    | 10.5  |
|          | Diclofenac          | Positive        | 9.5      | 296.0238                                        | C <sub>14</sub> H <sub>12</sub> Cl <sub>2</sub> NO <sub>2</sub>                | 296.0240       | 0.7         | 15.7    | 8.5   |
|          |                     | Negative        | 8.3      | 294.0092                                        | C <sub>14</sub> H <sub>10</sub> Cl <sub>2</sub> NO <sub>2</sub>                | 294.0094       | 0.5         | 5.7     | 9.5   |
|          | Dipyron             | Positive        | 4.2      | 218.1290                                        | C <sub>12</sub> H <sub>16</sub> N <sub>3</sub> O                               | 218.1288       | -0.8        | 9.1     | 6.5   |
|          | Fexofenadine        | Positive        | 7.8      | 502.2932                                        | C <sub>32</sub> H <sub>40</sub> NO <sub>4</sub>                                | 502.2952       | 3.9         | 38.3    | 13.5  |
|          | Hydrochlorothiazide | Negative        | 2.1      | 295.9570                                        | C <sub>7</sub> H <sub>7</sub> ClN <sub>3</sub> O <sub>4</sub> S <sub>2</sub>   | 295.9572       | 0.7         | 34.5    | 5.5   |
|          | Ibuprofen           | Negative        | 8.5      | 205.1236                                        | C <sub>13</sub> H <sub>17</sub> O <sub>2</sub>                                 | 205.1234       | -1.1        | 49.8    | 5.5   |
|          | Lamotrigine         | Positive        | 5.6      | 256.0156                                        | C <sub>9</sub> H <sub>8</sub> Cl <sub>2</sub> N <sub>5</sub>                   | 256.0151       | -1.7        | 6.8     | 7.5   |
|          | Losartan            | Positive        | 8.2      | 423.1691                                        | C <sub>22</sub> H <sub>24</sub> ClN <sub>6</sub> O                             | 423.1695       | 0.9         | 22.9    | 13.5  |
|          | Mesalazine          | Positive        | 1.4      | 154.0501                                        | C <sub>7</sub> H <sub>8</sub> NO <sub>3</sub>                                  | 154.0499       | -1.7        | 5.6     | 4.5   |
|          | Metformin           | Positive        | 1.1      | 130.1088                                        | C <sub>4</sub> H <sub>12</sub> N <sub>5</sub>                                  | 130.1087       | -0.8        | 9.5     | 1.5   |
|          | Naproxen            | Positive        | 8.6      | 231.1017                                        | C <sub>14</sub> H <sub>15</sub> O <sub>3</sub>                                 | 231.1016       | -0.7        | 4.7     | 7.5   |
|          |                     | Negative        | 6.7      | 229.0867                                        | C <sub>14</sub> H <sub>13</sub> O <sub>3</sub>                                 | 229.0870       | 1.4         | 18.3    | 8.5   |
|          | Nimesulide          | Negative        | 7.8      | 307.0394                                        | C <sub>13</sub> H <sub>11</sub> N <sub>2</sub> O <sub>5</sub> S                | 307.0394       | -0.0        | 15.1    | 9.5   |
|          | Ondansetron         | Positive        | 5.6      | 294.1600                                        | C <sub>18</sub> H <sub>20</sub> N <sub>3</sub> O                               | 294.1601       | 0.1         | 14.1    | 10.5  |
|          | Pseudoephedrine     | Positive        | 3.0      | 166.1230                                        | C <sub>10</sub> H <sub>16</sub> NO                                             | 166.1226       | -2.1        | 8.8     | 3.5   |
|          | Pyridoxine          | Positive        | 1.2      | 170.0813                                        | C <sub>8</sub> H <sub>12</sub> NO <sub>3</sub>                                 | 170.0812       | -0.5        | 5.9     | 3.5   |
|          | Rosuvastatin        | Positive        | 8.1      | 482.1749                                        | C <sub>22</sub> H <sub>29</sub> FN <sub>3</sub> O <sub>6</sub> S               | 482.1756       | 1.4         | 16.6    | 9.5   |
|          |                     | Negative        | 7.5      | 480.1609                                        | C <sub>22</sub> H <sub>27</sub> FN <sub>3</sub> O <sub>6</sub> S               | 480.1610       | 0.3         | 19.7    | 10.5  |
|          | Thiamine            | Positive        | 1.0      | 265.1119                                        | C <sub>12</sub> H <sub>17</sub> N <sub>4</sub> OS                              | 265.1118       | -0.7        | 30.5    | 6.5   |
|          | Topiramate          | Negative        | 6.1      | 338.0913                                        | C <sub>12</sub> H <sub>20</sub> NO <sub>8</sub> S                              | 338.0915       | 0.5         | 21.4    | 3.5   |
| Tramadol | Positive            | 5.0             | 264.1960 | C <sub>16</sub> H <sub>26</sub> NO <sub>2</sub> | 264.1958                                                                       | -0.6           | 8.8         | 4.5     |       |
| Sep. 17  | Acetaminophen       | Positive        | 2.3      | 152.0706                                        | C <sub>8</sub> H <sub>10</sub> NO <sub>2</sub>                                 | 152.0706       | -0.2        | 4.4     | 4.5   |
|          |                     | Negative        | 2.3      | 150.0560                                        | C <sub>8</sub> H <sub>8</sub> NO <sub>2</sub>                                  | 150.0561       | 0.5         | 10.7    | 5.5   |
|          | Atenolol            | Positive        | 2.0      | 267.1705                                        | C <sub>14</sub> H <sub>23</sub> N <sub>2</sub> O <sub>3</sub>                  | 267.1703       | -0.8        | 7.1     | 4.5   |
|          | Caffeine            | Positive        | 4.1      | 195.0882                                        | C <sub>8</sub> H <sub>11</sub> N <sub>4</sub> O <sub>2</sub>                   | 195.0877       | -3          | 23.6    | 5.5   |
|          | Carisoprodol        | Positive        | 8.0      | 261.1804                                        | C <sub>12</sub> H <sub>25</sub> N <sub>2</sub> O <sub>4</sub>                  | 261.1809       | 1.7         | 12.6    | 1.5   |
|          | Celecoxib           | Negative        | 9.4      | 380.0678                                        | C <sub>17</sub> H <sub>13</sub> F <sub>3</sub> N <sub>3</sub> O <sub>2</sub> S | 380.0686       | 2           | 26.4    | 12    |
|          | Desvenlafaxine      | Positive        | 5.1      | 264.1958                                        | C <sub>16</sub> H <sub>26</sub> NO <sub>2</sub>                                | 264.1958       | 0.1         | 2.9     | 4.5   |
|          | Diazepam            | Positive        | 8.9      | 285.0790                                        | C <sub>16</sub> H <sub>14</sub> ClN <sub>2</sub> O                             | 285.0789       | -0.3        | 20.9    | 10.5  |
|          | Diclofenac          | Positive        | 9.5      | 296.0236                                        | C <sub>14</sub> H <sub>12</sub> Cl <sub>2</sub> NO <sub>2</sub>                | 296.0240       | 1.3         | 12      | 8.5   |

|                |                     |          |     |          |                                                                              |          |      |       |      |
|----------------|---------------------|----------|-----|----------|------------------------------------------------------------------------------|----------|------|-------|------|
|                |                     | Negative | 8.3 | 294.0093 | C <sub>14</sub> H <sub>10</sub> Cl <sub>2</sub> NO <sub>2</sub>              | 294.0094 | 0.5  | 4.3   | 9.5  |
|                | Divalproate         | Positive | 9.1 | 145.1220 | C <sub>8</sub> H <sub>17</sub> O <sub>2</sub>                                | 145.1223 | 1.8  | 50    | 0.5  |
|                | Ibuprofen           | Negative | 8.5 | 205.1231 | C <sub>13</sub> H <sub>17</sub> O <sub>2</sub>                               | 205.1234 | 1.3  | 26.3  | 5.5  |
|                | Ketoprofen          | Positive | 8.3 | 255.1010 | C <sub>16</sub> H <sub>15</sub> O <sub>3</sub>                               | 255.1016 | 2.2  | 2.3   | 9.5  |
|                | Losartan            | Positive | 8.2 | 423.1685 | C <sub>22</sub> H <sub>24</sub> ClN <sub>6</sub> O                           | 423.1695 | 2.2  | 7.9   | 13.5 |
|                | Mesalazine          | Positive | 1.4 | 154.0501 | C <sub>7</sub> H <sub>8</sub> NO <sub>3</sub>                                | 154.0499 | -1.7 | 7.3   | 4.5  |
|                | Metformin           | Positive | 1.1 | 130.1088 | C <sub>4</sub> H <sub>12</sub> N <sub>5</sub>                                | 130.1087 | -0.9 | 9.1   | 1.5  |
|                | Naproxen            | Positive | 8.6 | 231.1014 | C <sub>14</sub> H <sub>15</sub> O <sub>3</sub>                               | 231.1016 | 0.8  | 15    | 7.5  |
|                | Nimesulide          | Negative | 7.8 | 307.0394 | C <sub>13</sub> H <sub>11</sub> N <sub>2</sub> O <sub>5</sub> S              | 307.0394 | 0.1  | 34.9  | 9.5  |
|                | Pseudoephedrine     | Positive | 3.0 | 166.1226 | C <sub>10</sub> H <sub>16</sub> NO                                           | 166.1226 | 0.1  | 3.6   | 3.5  |
|                | Rosuvastatin        | Positive | 8.2 | 482.1752 | C <sub>22</sub> H <sub>29</sub> FN <sub>3</sub> O <sub>6</sub> S             | 482.1756 | 0.8  | 16.8  | 9.5  |
|                | Rosuvastatin        | Negative | 7.5 | 480.1601 | C <sub>22</sub> H <sub>27</sub> FN <sub>3</sub> O <sub>6</sub> S             | 480.1610 | 1.9  | 14.5  | 10.5 |
|                | Topiramate          | Positive | 6.1 | 340.1053 | C <sub>12</sub> H <sub>22</sub> NO <sub>8</sub> S                            | 340.1061 | 2.2  | 10.2  | 2.5  |
|                |                     | Negative | 6.2 | 338.0915 | C <sub>12</sub> H <sub>20</sub> NO <sub>8</sub> S                            | 338.0915 | -0.1 | 8.4   | 3.5  |
|                | Acetaminophen       | Positive | 2.2 | 152.0705 | C <sub>8</sub> H <sub>10</sub> NO <sub>2</sub>                               | 152.0706 | 0.4  | 1.8   | 4.5  |
|                |                     | Negative | 2.2 | 150.0563 | C <sub>8</sub> H <sub>8</sub> NO <sub>2</sub>                                | 150.0561 | -1.4 | 4.6   | 5.5  |
|                | Atenolol            | Positive | 2.0 | 267.1700 | C <sub>14</sub> H <sub>23</sub> N <sub>2</sub> O <sub>3</sub>                | 267.1703 | 1.1  | 6.3   | 4.5  |
|                | Caffeine            | Positive | 4.1 | 195.0878 | C <sub>8</sub> H <sub>11</sub> N <sub>4</sub> O <sub>2</sub>                 | 195.0877 | -0.5 | 8     | 5.5  |
|                | Codeine             | Positive | 2.7 | 300.1595 | C <sub>18</sub> H <sub>22</sub> NO <sub>3</sub>                              | 300.1594 | -0.4 | 3.3   | 8.5  |
|                | Desvenlafaxine      | Positive | 5.0 | 264.1958 | C <sub>16</sub> H <sub>26</sub> NO <sub>2</sub>                              | 264.1958 | -0.1 | 21.7  | 4.5  |
|                | Diazepam            | Positive | 8.8 | 285.0789 | C <sub>16</sub> H <sub>14</sub> ClN <sub>2</sub> O                           | 285.0789 | 0    | 23.1  | 10.5 |
|                | Diclofenac          | Positive | 9.5 | 296.0241 | C <sub>14</sub> H <sub>12</sub> Cl <sub>2</sub> NO <sub>2</sub>              | 296.0240 | -0.6 | 34.5  | 8.5  |
|                |                     | Negative | 8.3 | 294.0087 | C <sub>14</sub> H <sub>10</sub> Cl <sub>2</sub> NO <sub>2</sub>              | 294.0094 | 2.3  | 32.5  | 9.5  |
|                | Dipyron             | Positive | 4.1 | 218.1292 | C <sub>12</sub> H <sub>16</sub> N <sub>3</sub> O                             | 218.1288 | -1.9 | 32.1  | 6.5  |
|                | Escitalopram        | Positive | 6.9 | 325.1712 | C <sub>20</sub> H <sub>22</sub> FN <sub>2</sub> O                            | 325.1711 | -0.5 | 21.9  | 10.5 |
|                | Etodolac            | Positive | 9.4 | 288.1606 | C <sub>17</sub> H <sub>22</sub> NO <sub>3</sub>                              | 288.1594 | -4   | 111.4 | 7.5  |
|                |                     | Negative | 8.7 | 286.1446 | C <sub>17</sub> H <sub>20</sub> NO <sub>3</sub>                              | 286.1449 | 1.1  | 36.8  | 8.5  |
|                | Fexofenadine        | Positive | 7.8 | 502.2938 | C <sub>32</sub> H <sub>40</sub> NO <sub>4</sub>                              | 502.2952 | 2.8  | 24.2  | 13.5 |
|                |                     | Positive | 6.3 | 331.0156 | C <sub>12</sub> H <sub>12</sub> ClN <sub>2</sub> O <sub>5</sub> S            | 331.0150 | -1.9 | 49.4  | 7.5  |
|                | Furosemide          | Negative | 5.4 | 329.0002 | C <sub>12</sub> H <sub>10</sub> ClN <sub>2</sub> O <sub>5</sub> S            | 329.0004 | 0.9  | 48.7  | 8.5  |
| <b>Oct. 17</b> | Hydrochlorothiazide | Negative | 2.2 | 295.9574 | C <sub>7</sub> H <sub>7</sub> ClN <sub>3</sub> O <sub>4</sub> S <sub>2</sub> | 295.9572 | -0.8 | 39    | 5.5  |
|                |                     | Positive | 9.8 | 207.1379 | C <sub>13</sub> H <sub>19</sub> O <sub>2</sub>                               | 207.1380 | 0    | 10.3  | 4.5  |
|                | Ibuprofen           | Negative | 8.5 | 205.1232 | C <sub>13</sub> H <sub>17</sub> O <sub>2</sub>                               | 205.1234 | 0.8  | 4.6   | 5.5  |
|                | Mesalazine          | Positive | 1.4 | 154.0501 | C <sub>7</sub> H <sub>8</sub> NO <sub>3</sub>                                | 154.0499 | -1.4 | 6.6   | 4.5  |
|                | Metformin           | Positive | 1.0 | 130.1087 | C <sub>4</sub> H <sub>12</sub> N <sub>5</sub>                                | 130.1087 | 0.4  | 4.9   | 1.5  |
|                | Naproxen            | Positive | 8.6 | 231.1017 | C <sub>14</sub> H <sub>15</sub> O <sub>3</sub>                               | 231.1016 | -0.8 | 1.8   | 7.5  |
|                |                     | Negative | 6.7 | 229.0869 | C <sub>14</sub> H <sub>13</sub> O <sub>3</sub>                               | 229.0870 | 0.6  | 7.9   | 8.5  |
|                | Nimesulide          | Positive | 8.3 | 309.0545 | C <sub>13</sub> H <sub>13</sub> N <sub>2</sub> O <sub>5</sub> S              | 309.0540 | -1.8 | 50.4  | 8.5  |
|                |                     | Negative | 7.9 | 307.0394 | C <sub>13</sub> H <sub>11</sub> N <sub>2</sub> O <sub>5</sub> S              | 307.0394 | 0.1  | 9.2   | 9.5  |
|                | Omeprazole          | Positive | 7.5 | 346.1218 | C <sub>17</sub> H <sub>20</sub> N <sub>3</sub> O <sub>3</sub> S              | 346.1220 | 0.6  | 11    | 9.5  |
|                | Ondansetron         | Positive | 5.5 | 294.1600 | C <sub>18</sub> H <sub>20</sub> N <sub>3</sub> O                             | 294.1601 | 0.5  | 0.9   | 10.5 |
|                | Propranolol         | Positive | 6.8 | 260.1647 | C <sub>16</sub> H <sub>22</sub> NO <sub>2</sub>                              | 260.1645 | -0.8 | 18.1  | 6.5  |
|                | Pseudoephedrine     | Positive | 2.9 | 166.1227 | C <sub>10</sub> H <sub>16</sub> NO                                           | 166.1226 | -0.4 | 1.8   | 3.5  |
|                | Thiamine            | Positive | 1.0 | 265.1119 | C <sub>12</sub> H <sub>17</sub> N <sub>4</sub> OS                            | 265.1118 | -0.4 | 50    | 6.5  |
|                | Tramadol            | Positive | 5.0 | 278.2117 | C <sub>17</sub> H <sub>28</sub> NO <sub>2</sub>                              | 278.2115 | -0.8 | 3.2   | 4.5  |

|                     |                 |               |          |          |                                                                                |                                                               |          |      |      |      |
|---------------------|-----------------|---------------|----------|----------|--------------------------------------------------------------------------------|---------------------------------------------------------------|----------|------|------|------|
| Nov.<br>17          | Venlafaxine     | Positive      | 6.4      | 278.2115 | C <sub>17</sub> H <sub>28</sub> NO <sub>2</sub>                                | 278.2115                                                      | -0.3     | 3.2  | 4.5  |      |
|                     | Acetaminophen   | Positive      | 2.2      | 152.0706 | C <sub>8</sub> H <sub>10</sub> NO <sub>2</sub>                                 | 152.0706                                                      | 0.1      | 3.3  | 4.5  |      |
|                     |                 | Negative      | 2.2      | 150.0562 | C <sub>8</sub> H <sub>8</sub> NO <sub>2</sub>                                  | 150.0561                                                      | -0.8     | 2.3  | 5.5  |      |
|                     | Atenolol        | Positive      | 2.0      | 267.1700 | C <sub>14</sub> H <sub>23</sub> N <sub>2</sub> O <sub>3</sub>                  | 267.1703                                                      | 1.1      | 5.4  | 4.5  |      |
|                     | Caffeine        | Positive      | 4.1      | 195.0880 | C <sub>8</sub> H <sub>11</sub> N <sub>4</sub> O <sub>2</sub>                   | 195.0877                                                      | -1.8     | 14.2 | 5.5  |      |
|                     | Celecoxib       | Negative      | 9.4      | 380.0689 | C <sub>17</sub> H <sub>13</sub> F <sub>3</sub> N <sub>3</sub> O <sub>2</sub> S | 380.0686                                                      | -0.8     | 45.1 | 12   |      |
|                     | Desvenlafaxine  | Positive      | 4.9      | 264.1961 | C <sub>16</sub> H <sub>26</sub> NO <sub>2</sub>                                | 264.1958                                                      | -1.2     | 13.2 | 4.5  |      |
|                     | Diazepam        | Positive      | 8.8      | 285.0793 | C <sub>16</sub> H <sub>14</sub> ClN <sub>2</sub> O                             | 285.0789                                                      | -1.2     | 17.2 | 10.5 |      |
|                     | Diclofenac      | Positive      | 9.5      | 296.0241 | C <sub>14</sub> H <sub>12</sub> Cl <sub>2</sub> NO <sub>2</sub>                | 296.0240                                                      | -0.5     | 17.6 | 8.5  |      |
|                     |                 | Negative      | 8.3      | 294.0088 | C <sub>14</sub> H <sub>10</sub> Cl <sub>2</sub> NO <sub>2</sub>                | 294.0094                                                      | 2.1      | 39.8 | 9.5  |      |
|                     | Dimenhydrinate  | Positive      | 4.7      | 215.0330 | C <sub>7</sub> H <sub>8</sub> ClN <sub>4</sub> O <sub>2</sub>                  | 215.0330                                                      | 0.3      | 50   | 5.5  |      |
|                     | Dipyron         | Positive      | 4.1      | 218.1289 | C <sub>12</sub> H <sub>16</sub> N <sub>3</sub> O                               | 218.1288                                                      | -0.5     | 7.1  | 6.5  |      |
|                     | Enalapril       | Positive      | 7.0      | 377.2071 | C <sub>20</sub> H <sub>29</sub> N <sub>2</sub> O <sub>5</sub>                  | 377.2071                                                      | 0.1      | 22.6 | 7.5  |      |
|                     | Fexofenadine    | Positive      | 7.8      | 502.2952 | C <sub>32</sub> H <sub>40</sub> NO <sub>4</sub>                                | 502.2952                                                      | 0        | 5.2  | 13.5 |      |
|                     |                 | Negative      | 7.6      | 500.2807 | C <sub>32</sub> H <sub>38</sub> NO <sub>4</sub>                                | 500.2806                                                      | -0.1     | 16.8 | 15   |      |
|                     | Furosemide      | Positive      | 6.3      | 331.0148 | C <sub>12</sub> H <sub>12</sub> ClN <sub>2</sub> O <sub>5</sub> S              | 331.0150                                                      | 0.7      | 67.9 | 7.5  |      |
|                     |                 | Negative      | 5.4      | 329.0001 | C <sub>12</sub> H <sub>10</sub> ClN <sub>2</sub> O <sub>5</sub> S              | 329.0004                                                      | 1        | 50.9 | 8.5  |      |
|                     | Ibuprofeno      | Positive      | 10.0     | 207.1384 | C <sub>13</sub> H <sub>19</sub> O <sub>2</sub>                                 | 207.1380                                                      | -2.1     | 8    | 4.5  |      |
|                     |                 | Negative      | 8.5      | 205.1234 | C <sub>13</sub> H <sub>17</sub> O <sub>2</sub>                                 | 205.1234                                                      | 0.2      | 6.5  | 5.5  |      |
|                     | Mesalazine      | Positive      | 1.4      | 154.0499 | C <sub>7</sub> H <sub>8</sub> NO <sub>3</sub>                                  | 154.0499                                                      | -0.3     | 6.3  | 4.5  |      |
|                     | Metformin       | Positive      | 1.1      | 130.1087 | C <sub>4</sub> H <sub>12</sub> N <sub>5</sub>                                  | 130.1087                                                      | 0        | 10.9 | 1.5  |      |
|                     | Metronidazole   | Positive      | 2.5      | 172.0717 | C <sub>6</sub> H <sub>10</sub> N <sub>3</sub> O <sub>3</sub>                   | 172.0717                                                      | -0.1     | 10.9 | 3.5  |      |
|                     | Naproxen        | Positive      | 8.6      | 231.1017 | C <sub>14</sub> H <sub>15</sub> O <sub>3</sub>                                 | 231.1016                                                      | -0.4     | 3.4  | 7.5  |      |
|                     | Nimesulide      | Negative      | 7.8      | 307.0392 | C <sub>13</sub> H <sub>11</sub> N <sub>2</sub> O <sub>5</sub> S                | 307.0394                                                      | 0.7      | 5.3  | 9.5  |      |
|                     | Pseudoephedrine | Positive      | 3.0      | 166.1228 | C <sub>10</sub> H <sub>16</sub> NO                                             | 166.1226                                                      | -1.2     | 5.5  | 3.5  |      |
|                     | Tramadol        | Positive      | 5.0      | 264.1962 | C <sub>16</sub> H <sub>26</sub> NO <sub>2</sub>                                | 264.1958                                                      | -1.5     | 13.2 | 4.5  |      |
|                     | Dec. 17         | Acetaminophen | Positive | 2.3      | 152.0708                                                                       | C <sub>8</sub> H <sub>10</sub> NO <sub>2</sub>                | 152.0706 | -1.2 | 4    | 4.5  |
|                     |                 |               | Negative | 2.2      | 150.0561                                                                       | C <sub>8</sub> H <sub>8</sub> NO <sub>2</sub>                 | 150.0561 | -0.1 | 1.1  | 5.5  |
|                     |                 | Atenolol      | Positive | 2.0      | 267.1702                                                                       | C <sub>14</sub> H <sub>23</sub> N <sub>2</sub> O <sub>3</sub> | 267.1703 | 0.3  | 9.7  | 4.5  |
|                     |                 | Caffeine      | Positive | 4.1      | 195.0878                                                                       | C <sub>8</sub> H <sub>11</sub> N <sub>4</sub> O <sub>2</sub>  | 195.0877 | -0.9 | 6.9  | 5.5  |
|                     |                 | Codeine       | Positive | 2.7      | 300.1596                                                                       | C <sub>18</sub> H <sub>22</sub> NO <sub>3</sub>               | 300.1594 | -0.8 | 5.2  | 8.5  |
|                     |                 | Diazepam      | Positive | 8.9      | 285.0791                                                                       | C <sub>16</sub> H <sub>14</sub> ClN <sub>2</sub> O            | 285.0789 | -0.5 | 17.2 | 10.5 |
| Diclofenac          |                 | Positive      | 9.5      | 296.0242 | C <sub>14</sub> H <sub>12</sub> Cl <sub>2</sub> NO <sub>2</sub>                | 296.0240                                                      | -1       | 50   | 8.5  |      |
|                     |                 | Negative      | 8.3      | 294.0090 | C <sub>14</sub> H <sub>10</sub> Cl <sub>2</sub> NO <sub>2</sub>                | 294.0094                                                      | 1.4      | 49.8 | 9.5  |      |
| Dimenhydrinate      |                 | Positive      | 4.7      | 215.0333 | C <sub>7</sub> H <sub>8</sub> ClN <sub>4</sub> O <sub>2</sub>                  | 215.0330                                                      | -1.0     | 28.4 | 5.5  |      |
| Dipyron             |                 | Positive      | 4.2      | 218.1291 | C <sub>12</sub> H <sub>16</sub> N <sub>3</sub> O                               | 218.1288                                                      | -1.3     | 5.7  | 6.5  |      |
| Enalapril           |                 | Positive      | 7.0      | 377.2079 | C <sub>20</sub> H <sub>29</sub> N <sub>2</sub> O <sub>5</sub>                  | 377.2071                                                      | -2       | 3.4  | 7.5  |      |
| Fexofenadine        |                 | Positive      | 7.8      | 502.2956 | C <sub>32</sub> H <sub>40</sub> NO <sub>4</sub>                                | 502.2952                                                      | -0.8     | 15   | 13.5 |      |
| Furosemide          |                 | Positive      | 6.3      | 331.0153 | C <sub>12</sub> H <sub>12</sub> ClN <sub>2</sub> O <sub>5</sub> S              | 331.0150                                                      | -1       | 29.2 | 7.5  |      |
|                     |                 | Negative      | 5.5      | 329.0000 | C <sub>12</sub> H <sub>10</sub> ClN <sub>2</sub> O <sub>5</sub> S              | 329.0004                                                      | 1.3      | 10   | 8.5  |      |
| Hydrochlorothiazide |                 | Negative      | 2.1      | 295.9572 | C <sub>7</sub> H <sub>7</sub> ClN <sub>3</sub> O <sub>4</sub> S <sub>2</sub>   | 295.9572                                                      | 0.1      | 9.1  | 5.5  |      |
| Losartan            |                 | Positive      | 8.2      | 423.1696 | C <sub>22</sub> H <sub>24</sub> ClN <sub>6</sub> O                             | 423.1695                                                      | -0.3     | 19.7 | 13.5 |      |
| Metformin           |                 | Positive      | 1.1      | 130.1088 | C <sub>4</sub> H <sub>12</sub> N <sub>5</sub>                                  | 130.1087                                                      | -0.8     | 17.2 | 1.5  |      |
| Nimesulide          |                 | Negative      | 7.9      | 307.0392 | C <sub>13</sub> H <sub>11</sub> N <sub>2</sub> O <sub>5</sub> S                | 307.0394                                                      | 0.7      | 11.3 | 9.5  |      |



|         |                     |          |     |          |                                                                              |          |      |      |      |
|---------|---------------------|----------|-----|----------|------------------------------------------------------------------------------|----------|------|------|------|
|         | Pyridoxine          | Positive | 1.2 | 170.0813 | C <sub>8</sub> H <sub>12</sub> NO <sub>3</sub>                               | 170.0812 | -0.6 | 4.1  | 3.5  |
|         | Rosuvastatin        | Positive | 8.1 | 482.1765 | C <sub>22</sub> H <sub>29</sub> FN <sub>3</sub> O <sub>6</sub> S             | 482.1756 | -1.9 | 14.3 | 9.5  |
|         | Sotalol             | Positive | 1.7 | 273.1269 | C <sub>12</sub> H <sub>21</sub> N <sub>2</sub> O <sub>3</sub> S              | 273.1267 | -0.6 | 48.9 | 3.5  |
|         | Tramadol            | Positive | 5.0 | 264.1960 | C <sub>16</sub> H <sub>26</sub> NO <sub>2</sub>                              | 264.1958 | -0.6 | 11.8 | 4.5  |
|         | Acetaminophen       | Positive | 2.3 | 152.0704 | C <sub>8</sub> H <sub>10</sub> NO <sub>2</sub>                               | 152.0706 | 1.1  | 2.4  | 4.5  |
|         |                     | Negative | 2.3 | 150.0563 | C <sub>8</sub> H <sub>8</sub> NO <sub>2</sub>                                | 150.0561 | -1.5 | 5.1  | 5.5  |
|         | Atenolol            | Positive | 2.0 | 267.1701 | C <sub>14</sub> H <sub>23</sub> N <sub>2</sub> O <sub>3</sub>                | 267.1703 | 0.6  | 1.8  | 4.5  |
|         | Caffeine            | Positive | 4.1 | 195.0875 | C <sub>8</sub> H <sub>11</sub> N <sub>4</sub> O <sub>2</sub>                 | 195.0877 | 0.9  | 7.6  | 5.5  |
|         | Codeine             | Positive | 2.7 | 300.1593 | C <sub>18</sub> H <sub>22</sub> NO <sub>3</sub>                              | 300.1594 | 0.6  | 6.9  | 8.5  |
|         | Desvenlafaxine      | Positive | 4.9 | 264.1959 | C <sub>16</sub> H <sub>26</sub> NO <sub>2</sub>                              | 264.1958 | -0.2 | 6.3  | 4.5  |
|         | Diclofenac          | Positive | 9.5 | 296.0239 | C <sub>14</sub> H <sub>12</sub> Cl <sub>2</sub> NO <sub>2</sub>              | 296.0240 | 0.3  | 19.2 | 8.5  |
|         |                     | Negative | 8.3 | 294.0083 | C <sub>14</sub> H <sub>10</sub> Cl <sub>2</sub> NO <sub>2</sub>              | 294.0094 | 3.8  | 50   | 9.5  |
|         | Dipyrrone           | Positive | 4.1 | 218.1293 | C <sub>12</sub> H <sub>16</sub> N <sub>3</sub> O                             | 218.1288 | -2.5 | 49.7 | 6.5  |
| Jan. 18 | Fexofenadine        | Positive | 7.8 | 502.2944 | C <sub>32</sub> H <sub>40</sub> NO <sub>4</sub>                              | 502.2952 | 1.6  | 7.2  | 13.5 |
|         |                     | Negative | 7.7 | 500.2804 | C <sub>32</sub> H <sub>38</sub> NO <sub>4</sub>                              | 500.2806 | 0.5  | 8.3  | 15   |
|         | Furosemide          | Negative | 5.4 | 329.0004 | C <sub>12</sub> H <sub>10</sub> ClN <sub>2</sub> O <sub>5</sub> S            | 329.0004 | 0.1  | 26.3 | 8.5  |
|         | Hydrochlorothiazide | Negative | 2.2 | 295.9571 | C <sub>7</sub> H <sub>7</sub> ClN <sub>3</sub> O <sub>4</sub> S <sub>2</sub> | 295.9572 | 0.4  | 35.8 | 5.5  |
|         | Mesalazine          | Positive | 1.4 | 154.0500 | C <sub>7</sub> H <sub>8</sub> NO <sub>3</sub>                                | 154.0499 | -1.1 | 6.4  | 4.5  |
|         | Metformin           | Positive | 1.1 | 130.1088 | C <sub>4</sub> H <sub>12</sub> N <sub>5</sub>                                | 130.1087 | -0.6 | 43.6 | 1.5  |
|         | Nimesulide          | Negative | 7.8 | 307.0390 | C <sub>13</sub> H <sub>11</sub> N <sub>2</sub> O <sub>5</sub> S              | 307.0394 | 1.5  | 9.7  | 9.5  |
|         | Ondansetron         | Positive | 5.5 | 294.1599 | C <sub>18</sub> H <sub>20</sub> N <sub>3</sub> O                             | 294.1601 | 0.5  | 18.7 | 10.5 |
|         | Rosuvastatin        | Negative | 7.5 | 480.1625 | C <sub>22</sub> H <sub>27</sub> FN <sub>3</sub> O <sub>6</sub> S             | 480.1610 | -3.1 | 33.7 | 11   |
|         | Tramadol            | Positive | 5.2 | 264.1956 | C <sub>16</sub> H <sub>26</sub> NO <sub>2</sub>                              | 264.1958 | 0.8  | 12.9 | 4.5  |

Where: \* mSigma: indicates the error in relation to the isotopic profile

\*\* RDB: ring double bonds

## Notes and References

- 1.E. Carraro, Si. Bonetta, C. Bertino, E. Lorenzi, Sa. Bonetta, G. Gilli, *J. Environ. Manage.*, 2016,**168**, 185–199.
- 2.E. Emmanuel, M.G. Pierre, Y. Perrodin, *Environ. Int.*, 2009,**35**, 718–726.
- 3.A. Kumar, P. Dhall, R. Kumar, *Int. Biodeterior. Biodegrad.*2010, **64**, 197–202.
- 4.S. Esplugas, S. Contreras, D.F.Ollis, *J. Environ. Eng.*,2004, **130**, 967–974.
